# **Recruitment of CRISPR-Cas systems by Tn7-like transposons**

Joseph E. Peters<sup>1#</sup>, Kira S. Makarova<sup>2</sup>, Sergey Shmakov<sup>3</sup>, Eugene V. Koonin<sup>2#</sup>

<sup>1</sup> Department of Microbiology, Cornell University, Ithaca, NY, 14853, USA

<sup>2</sup> National Center for Biotechnology Information, National Institutes of Health, Bethesda, MD

<sup>3</sup> Skolkovo Institute of Science and Technology, Skolkovo, 143025, Russia

# Address correspondence to koonin@ncbi.nlm.nih.gov or joe.peters@cornell.edu

Running title = Tn7 and CRISPR-Cas

## Abstract

A survey of bacterial and archaeal genomes shows that many Tn7-like transposons contain ‘minimal’ type I-F CRISPR-Cas systems that consist of fused cas8f and cas5f, cas7f and cas6f genes, and a short CRISPR array. Additionally, several small groups of Tn7-like transposons encompass similarly truncated type I-B CRISPR-Cas systems. This gene composition of the transposon-associated CRISPR-Cas systems implies that they are competent for pre-crRNA processing yielding mature crRNAs and target binding but not target cleavage that is required for interference. Here we present phylogenetic analysis demonstrating that evolution of the CRISPR-Cas containing transposons included a single, ancestral capture of a type I-F locus and two independent instances of type I-B loci capture. We further show that the transposon-associated CRISPR arrays contain spacers homologous to plasmid and temperate phage sequences, and in some cases, chromosomal sequences adjacent to the transposon. A hypothesis is proposed that the transposon-encoded CRISPR-Cas systems generate displacement (R-loops) in the cognate DNA sites, targeting the transposon to these sites and thus facilitating their spread via plasmids and phages. This scenario fits the “guns for hire” concept whereby mobile genetic elements can capture host defense systems and repurpose them for different stages in the life cycle of the element.

## Importance

CRISPR-Cas is an adaptive immunity system that protects bacteria and archaea from mobile genetic elements. We present comparative genomic and phylogenetic analysis of degenerate CRISPR-Cas variants associated with distinct families of transposable elements and develop the hypothesis that such repurposed defense systems contribute to the transposable element propagation by facilitating transposition into specific sites. Such recruitment of defense systems by mobile elements supports the “guns for hire” concept under which the same enzymatic machineries can be alternately employed for transposon proliferation or host defense.

**Key words:** CRISPR-Cas system, Tn7 transposon, transposition strategy, crRNA guide, target-site selection

## Introduction

CRISPR (Clustered Regularly Interspaced Short Palindromic Repeat)-Cas (CRISPR-Associated proteins) systems are the only adaptive immune systems identified in prokaryotes (1). CRISPR-Cas systems possess modular organization which roughly reflects the three main functional stages of the CRISPR immune response: i) spacer acquisition (known as adaptation), ii) pre-crRNA processing and iii) interference (1). CRISPR-Cas systems are highly diverse but can be partitioned into two distinct classes based on the organization of the effector module that is responsible for processing and adaptation (2). Class 1 CRISPR-Cas systems are further divided into 3 types and 12 subtypes in all of which the effector modules are multisubunit complexes of Cas proteins (2). In contrast, in the currently identified 3 types and 12 subtypes of Class 2, the effector modules are represented by a single multidomain protein, such as the thoroughly characterized Cas9 (3-5).

At the adaptation stage, the Cas1-Cas2 protein complex, in some instances with additional involvement of effector module proteins, captures a segment of the target DNA (known as the protospacer) and inserts it at the 5' end of a CRISPR array (6-9). In the second, processing stage, a CRISPR array is transcribed into a long transcript known as pre-CRISPR (cr) RNA that is bound by Cas proteins and processed into mature, small crRNAs. In most Class 1 systems, the pre-crRNA processing is catalyzed by the Cas6 protein that, in some cases, is loosely associated with the effector complex (1, 10). The final, interference step involves binding of the mature crRNA by the multisubunit effector complex, scanning a DNA or RNA molecule for a sequence matching the crRNA guide and containing a protospacer adjacent motif (PAM), and cleavage of the target by a dedicated nuclease domain(s) (1, 10-12). The identity of this nuclease(s) differs between type I and type III CRISPR-Cas systems. In type I, the protein

responsible for target cleavage is Cas3 which typically consists of a Superfamily II helicase and HD-family nuclease domains (13). After the effector complex, which is denoted Cascade (CRISPR-associated complex for antiviral defense (14)) in type I systems, recognizes the cognate protospacer in the target DNA, it recruits Cas3, after which the helicase unwinds the target DNA duplex, and the HD nuclease cleaves both strands (15, 16). Type III systems lack Cas3, and the protein responsible for target cleavage is Cas10 which contains a polymerase-cyclase and HD-nuclease domains that are both required for the target degradation (17, 18).

In some of the CRISPR-Cas systems, the adaptation genes are encoded separately or even are missing from the genome containing effector complex genes. Among these non-autonomous CRISPR-Cas systems, those of type III systems have been characterized in most detail (1). It has been shown that class III effector complexes can utilize crRNA originating from CRISPR arrays associated with type I systems and thus do not depend on their own adaptation modules (19-23). Furthermore, the CRISPR-Cas systems of type IV, that are often encoded on plasmids, typically consist of the effector genes only (2). No adaptation genes and no associated nuclease domains could be found in the type IV loci although, occasionally, CRISPR arrays and *cas6*-like genes are present. The type IV systems have not yet been studied experimentally, so their mode of action remains unknown. Finally, several variants of type I systems, similarly to type IV, lack adaptation genes and genes for proteins involved in DNA cleavage. A “minimal” variant of subtype I-F has been identified in the bacterium *Shewanella putrefaciens*, with an effector module that consists only of Cas5f, Cas6f and Cas7f proteins, and lacks the large and small subunit present in other Cascade complexes (24). Even more dramatic minimization of subtype I-F has been observed in another variant of subtype I-F that lacks the adaptation module and consists solely of three effector genes, namely a fusion of *cas8f* (large subunit) with *cas5f* that is unique for this variant, *cas7f* and *cas6f* (Figure 1A) (2). Given the composition of their Cascade complex, these Cas1-

less minimal subtype I-F systems can be predicted to process pre-crRNA, yielding mature crRNAs, and recognize the target. However, they lack the Cas3 protein and therefore cannot be expected to be competent for target cleavage. Here we report an exhaustive *in silico* analysis of this system showing that it is strongly linked to a specialized group of transposons related to the well-studied Tn7.

The canonical Tn7 is notable because of the level of control it exerts over the target site selection (25). Three transposon-encoded proteins form the core transposition system including a heteromeric transposase (TnsA and TnsB) and a regulator protein (TnsC) (Figure 1B). In addition to the core TnsABC transposition proteins, Tn7 elements encode dedicated target site selection proteins (TnsD and TnsE) that only allow transposition when specific types of target sites are available. In conjunction with TnsABC, the sequence-specific DNA-binding protein TnsD directs transposition into a conserved site referred to as the Tn7 attachment site, *attTn7* (26). Transposition mediated by TnsABC + TnsE is preferentially directed into mobile plasmids and bacteriophages owing to the ability of TnsE to recognize complexes formed during specific types of DNA replication (27-30). Mobile elements related to Tn7 and encoding proteins homologous to TnsA, TnsB, and TnsC have been described that appear to use distinct attachment sites recognized by TnsD/TniQ-like proteins, but do not encode a TnsE-like protein (31).

Our analysis shows that the Cas1-less I-F systems associate with a distinct group of Tn7-like elements. These transposons encode TnsD/TniQ-like proteins and utilize novel attachment sites but lack TnsE-like proteins that normally promote horizontal transfer of the elements. Several identified matches for the spacers from the transposon-associated CRISPR arrays suggest that this system might function by targeting transposition to target sites enabled by guide

crRNAs. We hypothesize that the subtype I-F CRISPR-Cas machinery recruited by these elements facilitates their horizontal dissemination, mostly via plasmids and/or phages.

## Results and discussion

**A variant of the type I-F CRISPR-Cas system is specifically associated with a distinct family of Tn7-like elements.** For the purpose of comprehensive identification type I-F CRISPR-Cas loci, we chose the Cas7f protein as the probe given that it is the most conserved component in all systems of this subtype including the “minimal” variant lacking *cas1* and *cas2-cas3* genes. Using a PSI-BLAST search started with Cas7f profiles, we obtained 2905 Cas7f protein sequences, mapped them onto the respective genomes and annotated the genes in the 10 kb up- and downstream neighborhoods of the *cas7f* genes using PSI-BLAST against the conserved domain database (CDD). These 20 kb loci are long enough to cover a typical complete I-F system that consists of 6 genes (2). We then reconstructed a phylogenetic tree from all identified Cas7f protein sequences (Figure 2A, Supplemental Table S1, see respective Newick tree at [ftp://ftp.ncbi.nih.gov/pub/makarova/supplement/Peters\\_at\\_al\\_2017/](ftp://ftp.ncbi.nih.gov/pub/makarova/supplement/Peters_at_al_2017/)). Mapping gene neighborhoods on the tree revealed a single, monophyletic, strongly supported branch including all *cas1*-less I-F variants. As of this analysis, the branch encompassed 423 sequences from 19 genera of Gammaproteobacteria and appears to derive from a typical, complete I-F system (Figures 1A and 2A). Indeed, all other branches in the tree consist of Cas7f homologs from complete I-F systems containing a *cas1* gene within the locus. A few exceptions that are scattered in the tree are from either small contigs or disrupted *cas* loci. In the vast majority of the loci corresponding to the *cas1*-less branch, a *tniQ/msD* gene is located next to the *cas* genes (Figure 3).

To determine whether the association of the Cas1-less I-F systems with Tn7-like elements was unique or emerged independently on several occasions, we analyzed the TniQ/TnsD and TnsA families. The TnsA protein is the most highly conserved gene of the Tn7-like elements and is responsible for the unique behavior of the elements with heteromeric transposases (31-34). We collected and annotated 10,349 loci containing at least *tniQ/tnsD* or *tnsA* (Supplemental Table S2) and reconstructed a tree for both protein families (Figure 2 B and C and see respective Newick trees at [ftp://ftp.ncbi.nih.gov/pub/makarova/supplement/Peters\\_at\\_al\\_2017/](ftp://ftp.ncbi.nih.gov/pub/makarova/supplement/Peters_at_al_2017/)). In both trees, the loci containing *cas* genes of the *casI*-less I-F variant mapped to strongly supported monophyletic branches (Figure 2 B and C). Thus, phylogenetic analysis of both Cas7f and the associated transposon-encoded proteins reveals a strong link between a specific group of Tn7-like elements and a distinct variant of the subtype I-F CRISPR-Cas system. The Tn7-like elements in the clade that includes Tn6022 were identified as the outgroups to the respective branches in both the TnsA and TniQ/TnsD trees, suggesting that a member of the Tn6022 family is the ancestor of the CRISPR-associated variety of Tn7-like transposons (Figure 2B and C). Both clades include multiple, deep branches that are not associated with *cas* genes in the respective loci suggesting that the link with I-F system evolved relatively late in the history of this group of Tn7-like elements (see respective Newick trees at [ftp://ftp.ncbi.nih.gov/pub/makarova/supplement/Peters\\_at\\_al\\_2017/](ftp://ftp.ncbi.nih.gov/pub/makarova/supplement/Peters_at_al_2017/)). In several cases, however, the *cas* genes seem to have been lost from the vicinity of the conserved transposon genes (eg. *Shewanella baltica* OS678 and *Thiomicrospira crunogena* XCL\_2), suggesting that the CRISPR-Cas system is not essential for the transposon survival. However, there are no intact *casI*-less I-F



systems outside this transposon neighborhood, with the implication that this CRISPR-Cas variant is functional only when associated with a Tn7-like element.

We further investigated the *tniQ/tnsD/tnsA* loci in order to identify any other CRISPR-Cas systems that might be linked to Tn7-like transposons. Only a few such instances were identified, mostly complete loci containing the adaptation genes. The respective *tnsA* and/or *tniQ/tnsD* genes are scattered in the phylogenetic trees suggesting that most of these associations are effectively random and might be transient (Supplemental Table S2). However, some of such loci do show a degree of evolutionary coherence. Specifically, they form two small, unrelated branches in both the TnsA and the TniQ/TnsD trees (See I-B in Figure 2B-C). All these CRISPR-*cas* loci are present in different cyanobacteria, belong to the I-B subtype and lack adaptation genes as well as the *cas3* gene that is required for DNA cleavage in type I systems. Thus, to a large extent, these type I-B variants mimic the organization of the more common transposon-associated, *casI*-less I-F variant (See below).

**The *casI*-less type I-F CRISPR-Cas system is mobilized together with conserved transposition genes.** We analyzed the transposon end-sequences in the loci containing the I-F and I-B CRISPR-Cas variants in order to determine whether the *cas* genes were located within the boundaries of these elements or are simply adjacent to the transposon. The structure of the left and right ends of canonical Tn7 has been defined previously (Supplemental Figure S1). Tn7 ends are marked by a series of 22 bp TnsB-binding sites (35-37). Flanking the most distal TnsB-binding sites is an 8 base pair terminal sequence ending with 5'-TGT-3'/3'-ACA-5'. Tn7 contains 4 overlapping TnsB-binding sites in the ~90 bp right end of the element and three dispersed sites in the ~150 bp left end of the element, but the number and distribution of TnsB-binding sites can vary among Tn7-like elements (25, 31). End-sequences of Tn7-related elements can be

determined by identifying the directly-repeated 5 base pair target site duplication, the terminal 8 base-pair sequence, and 22 base pair TnsB-binding sites (the latter two found in an inverted configuration in the left and right ends of the element) (Supplemental Figure S1). Compared with the canonical Tn7 and Tn6022, Tn7-like elements show extensive variation in size and gene complements as illustrated by a representative set of 12 complete elements ranging in size from 22 kb to almost 120 kb (38, 39)(Figure 3 and Table 1). One of these elements has been previously identified in *Vibrio parahaemolyticus* RIMD2210633 as a member of the Tn7 superfamily and encodes the *Vibrio* pathogenicity determinant, the thermostable direct hemolysin (TDH) (40).

In our analysis of CRISPR-Cas systems, two groups of type I-B variants were identified in association with Tn7-like elements (Figure 2B-C). Similar to the type I-F CRISPR-Cas variant, these I-B systems are expected to be functional for maturing CRISPR transcripts and forming crRNA complexes at protospacers but lack adaptation genes and Cas3, and accordingly, are likely to be defective for interference. Furthermore, these type I-B CRISPR-Cas variants are associated with small CRISPR arrays (Figure 3). One group of the type I-B associated transposons encodes a TnsD/TniQ protein that belongs to the same clade as TnsD from canonical Tn7 and resides in the *attTn7* site downstream of *glmS*. An example from this subgroup has been previously identified in *Anabaena variabilis* (# 5291 in Figure 3), but the minimal Cas system contained in the element was not analyzed (41). The second group encodes a TniQ protein that belongs to a new family of elements encoding fused TnsA-TnsB proteins (#2757 in Figure 3).

Taken together, these findings indicate that the type I-F and I-B CRISPR-Cas variants identified in this work are part of the core gene repertoire in multiple clades of Tn7-like elements.

**Chromosomal insertions of the I-F CRISPR-Cas-associated elements show three recognizable attachment sites likely accessed by dedicated TniQ/TnsD proteins.** The canonical Tn7 element has been studied extensively, especially the transposition pathway that directs the element into the *attTn7* site located downstream of the conserved *glmS* gene. The Tn7 TnsD(TniQ) protein is a sequence-specific DNA-binding protein that recognizes a highly conserved 36 bp sequence in the downstream region of the *glmS* gene coding sequence (26, 42). Transposition events promoted by TnsABC+D are directed into a position 23 bp downstream of the region bound by TnsD. Tn7 transposition is orientation-specific in all transposition pathways; the transposon end proximal to the *tnsA* gene (the "right" end of the element) is adjacent to the DNA sequence or a specific protein complex recognized in each pathway (29, 42-44).

We analyzed the region adjacent to the point of insertion of the elements and identified three new attachment sites for the *casI*-less, type I-F-associated transposons. Similar to Tn7 insertions, one subgroup of the elements occurred downstream of a gene, but instead of *glmS*, these insertions were found downstream of an inosine-5'-monophosphate dehydrogenase gene (Table 1, Figure 3 and 4). The configurations found with the other recognizable attachment sites were new for Tn7-like elements. In one case, the attachment site was located upstream of the *yciA* gene, which encodes an acyl-CoA thioester hydrolase (Table 1, Figure 3 and 4). Presumably, insertion of the element into this attachment site would ablate the normal promoter, but changes in expression remain to be demonstrated experimentally. The third attachment site identified for the *casI*-less type I-F-associated elements is the first example where a non-protein-encoding gene was recognized, namely, the gene for the signal recognition particle RNA (SRP-RNA) (Table 1, Figure 3 and 4). The concordance between the phylogeny of the TniQ/TnsD proteins and the attachment site used by the element is consistent with the hypothesis that each

attachment site is recognized by a cognate TniQ/TnsD protein (Figure 4). Despite this concordance, many transposons appear to be inserted in random sites (Figure 4). It remains unclear how insertions were directed into these sites because they are unlikely to be specifically recognized by TniQ/TnsD proteins encoded by these elements, and these elements lack a homolog of the TnsE protein found in typical Tn7 transposons.

**Analysis of CRISPR arrays associated with the *casI*-less I-F systems.** The great majority of the transposon-associated I-F and I-B systems encompass a CRISPR array downstream of the *cas6* gene (See Figure 3 for examples). In most cases, this array contains only one or two spacers, suggesting that spacer acquisition in these arrays occurs only rarely (Table 2 and Figure 3). Nevertheless, the spacers are typically unrelated even in closely related bacterial genomes indicating that, occasionally, new spacers are incorporated, and old ones are lost. Obviously, only adaptation genes acting *in trans* can insert new spacers into these arrays. Among the 14 complete bacterial genomes containing elements with the I-F CRISPR-Cas, only two encompass other CRISPR-Cas loci containing adaptation genes, namely, *Vibrio fluvialis* ATCC 33809 and *Pseudoalteromonas rubra* SCSIO6842 that possess I-F and I-C systems, respectively. Among draft genomes, there are more cases where additional, complete CRISPR-Cas systems, mostly I-F and I-E, are present in the same genomes. Nevertheless, most of the genomes that contain the I-F variant associated with Tn7-like transposons lack other CRISPR-Cas system that would be able to provide for adaptation, which might account for the short CRISPR arrays. All 4 complete genomes containing elements associated with I-B systems encompass additional CRISPR-Cas loci containing adaptation genes, often of subtype I-D, which is abundant in cyanobacteria (2).

Altogether, more than 800 spacers were identified in the transposon-associated I-F and I-B CRISPR arrays (see automatically and manually identified spacers at [ftp://ftp.ncbi.nih.gov/pub/makarova/supplement/Peters\\_at\\_al\\_2017/](ftp://ftp.ncbi.nih.gov/pub/makarova/supplement/Peters_at_al_2017/)). As in most analyses of CRISPR spacers (45-47), only a small fraction of these spacers yielded significant matches to sequences in public databases. However, the matches that could be detected were informative because they were to plasmids and bacteriophages associated with the same bacterial genera where the respective elements are found (Table 2). We identified two cases (in *Photobacterium kishitanii* and *Photobacterium leiognathi*) of potential special interest, where spacers matched the region adjacent to the *tnsA*-gene proximal side of the element (Table 2), i.e. the specific region where complexes involved in targeting transposition events interact with the target DNA (29, 48, 49). An additional spacer match was found inside the transposon boundaries in several *Vibrio parahaemolyticus* strains (Table 2). A similar situation might have also occurred in a Tn7-like transposon associated with a type I-B CRISPR-Cas variant in a *Cyanothece* PCC 7822 plasmid although end sequences could not be unambiguously defined for this element (Table 2).

**A role for CRISPR-Cas in targeting transposition?** Taking into account all the observations on the transposon-associated CRISPR-Cas systems and previous studies on the mechanism of target site activation, we propose a model for the involvement of Cas1-less CRISPR-Cas systems in targeting transposition to facilitate cell-cell transfer of the element (Figure 5). Canonical Tn7 encodes two targeting pathways that are both mediated by the same set of TnsABC proteins (Figure 1B). The TnsABC+TnsD(TniQ) pathway appears to be broadly conserved allowing high frequency transposition into an attachment site recognized by a cognate TnsD/TniQ protein (Figure 1 and 4, Table 1)(31). The *casI*-less I-F CRISPR-Cas variant is encoded in the same location where the *tnsE* gene that promotes transposition into conjugal

plasmids and filamentous bacteriophages is typically located (Figure 3). Thus, it appears plausible that the CRISPR-Cas system functionally replaces *tnsE* as a mechanism facilitating horizontal transfer of the element. Support for this possibility comes from the observation that the transposon-associated CRISPR arrays largely carry plasmid and phage-specific spacers and could direct the transposon to the respective elements (Table 2).

**Distortions in B form DNA induced by Cas-crRNA could play a role in recruiting transposition.** Transposition into *attTn7* is well-understood at the molecular level; the DNA structure in the vicinity of the attachment site plays a central role in transposition (Figure 6 A, B and C). TnsD-binding induces an asymmetric distortion in the *attTn7* target DNA that is primarily responsible for attracting TnsC during transposition (48, 50)(Figure 6A). Protein-protein interaction between TnsD and TnsC have been detected (26) but multiple lines of evidence suggest a defining role for the distortion in the DNA for the target site selection (see below).

The TnsABC proteins are normally insufficient for Tn7 transposition *in vivo* or *in vitro* (51); however, certain gain-of-activity mutations in the regulator protein TnsC (TnsC\*) allow transposition in the absence of TnsD or TnsE (52, 53). Untargeted transposition is observed *in vitro* and *in vivo* with TnsABC\* in the absence of target site selection proteins (30, 52), but notably, transposition in this case is attracted to a specific location adjacent to a short segment of triplex-forming DNAs (44, 54). Analogous to transposition events found in *attTn7*, these events are targeted to a position on one side of the triplex-forming DNA in a unique orientation owing to the ability of TnsC to recognize the distortion formed at the triplex-to-B-form DNA transition (Figure 6C). Distortions induced in the target DNA are also implicated in transposition targeting by TnsABC+E (55) (Figure 6B). Given that distortions in B form DNA are also expected

adjacent to crRNA-bound effector complexes that generate R-loops through duplex formation between the crRNA and the protospacer (12, 56), there could be a mechanistic link between the well-understood Tn7 targeting process and DNA targeting by the CRISPR-Cas effector complexes (Figure 6D). This analogy is consistent with the left to right orientation of the two insertions located adjacent to spacer matches (Table 2).

### **Evolution of the association between CRISPR-Cas variants and Tn7 like elements.**

Given that at least some type I CRISPR-Cas systems selectively integrate spacers from plasmids and phages (6, 57), an attractive hypothesis is that the CRISPR-*cas* loci that randomly became associated with the transposon were fixed through selection for their ability to facilitate dissemination of transposons. As discussed above, because changes in DNA structure play an important role in target site selection by Tn7, relatively little evolutionary adaptation might be needed to allow the core TnsABC machinery to recognize crRNA-bound effector complexes for targeting. In this light, it is intriguing that association between CRISPR-Cas systems and Tn7-like elements occurred on multiple, independent occasions. The consistent minimalist features in the organization of the transposon-associated type I-F and I-B variants imply that they co-evolved with Tn7-like elements along parallel paths of reductive evolution. Both type I-F and type I-B systems have lost the adaptation module (*cas1* and *cas2*) and the *cas3* gene, which is required to cleave the target DNA in other type I systems (1). The absence of Cas3 implies that these CRISPR-Cas systems recognize but do not cleave the target, a mode of action that would allow the targeted DNA to serve as a vehicle for horizontal transfer of the respective Tn7-like transposon.

The transposon-associated CRISPR arrays are short, and the respective bacterial genomes often lack CRISPR adaptation modules. Thus, the majority of the CRISPR-containing

transposons are likely to be relatively recent arrivals to the respective genomes, conceivably, brought about by the plasmid or phage against which they carry a spacer. Once integrated into a new host attachment site, such transposons could “lie in waiting” for a horizontal transfer vehicle, either as a result of *in trans* acquisition of a new spacer that is specific to an endogenous plasmid or prophage or via the entry of an element that is already represented by a cognate spacer in the transposon-encoded CRISPR array. In some cases, an incoming plasmid or phage recognized by the CRISPR-Cas system and targeted for transposition would be incapacitated by the integration event. Nevertheless, even such unproductive integrations would still benefit the CRISPR-carrying transposon by protecting the host. In such cases, CRISPR-directed integration that is in keeping with a selfish behavior for the transposon would also qualify as altruistic behavior toward the host. It is unclear what advantage there could be to losing the capacity to undergo adaptation (i.e. lack of *cas1* and *cas2*). However, because Tn7 itself is a mobile element, sporadic access to adaptation systems *in trans* may prove safer for the element, limiting the acquisition of transposon-directed spacers in the element-encoded array. Occasionally, these elements appear to acquire spacers from the host chromosome, conceivably stimulating ectopic transposition within the same genome. Such a system could be beneficial in allowing transposition in hosts that lack attachment sites recognized by the element-encoded TniQ/TnsD protein.

Many questions remain regarding the functioning of the CRISPR-Cas in Tn7-like transposons including the possibility of direct interaction between the CRISPR effector complexes and either TnsD/TniQ, TnsABC, or other transposon-encoded accessory proteins. It is also unclear if these CRISPR-Cas variants might perform alternative or additional functions, beyond facilitation of transposition, such as gene silencing or protection of the transposon.



From the evolutionary standpoint, the transposon-associated CRISPR-Cas systems fit the “guns for hire” paradigm (58). Under this concept, genes of mobile genetic elements (MGE) genes are often recruited by host defense systems, and conversely, defense systems or components thereof can be captured by MGE and repurposed for counter-defense or other roles in the life cycle of the element. Recruitment of MGE apparently was central to the evolution of CRISPR-Cas, contributing to the origin of both the adaptation module and the Class 2 effector modules (3, 56, 59). On the other side of the equation, virus-encoded CRISPR-Cas systems have been identified and implicated in inhibition of host defense (60). The observations described here, if validated experimentally, seem to “close the circle” by demonstrating recruitment of CRISPR-Cas systems by transposons, conceivably, for a role in targeting transposition, a key step in transposon propagation. Finally, it has not escaped our notice that the transposon-encoded CRISPR-Cas systems described here potentially could be harnessed for genome engineering applications, namely, precise targeting of synthetic transposons encoding selectable markers and other genes of interest.

## Methods

### *Prokaryotic Genome Database and open reading frame annotation*

Archaeal and bacterial complete and draft genome sequences were downloaded from the NCBI FTP site (<ftp://ftp.ncbi.nlm.nih.gov/genomes/all/>) in March 2016. For incompletely annotated genomes (coding density less than 0.6 CDS per kbp), the existing annotation was discarded and replaced with the Meta-GeneMark 1 (61) annotation using the standard model MetaGeneMark\_v1.mod (Heuristic model for genetic code 11 and GC 30). Altogether, the

database includes 4,961 completely sequenced and assembled genomes and 43,599 partially sequenced genomes.

Profiles for three families protein families, namely Cas7f (cd09737, pfam09615), TnsA (pfam08722, pfam08721) and TnsQ/TnsD (pfam06527), that are available in the NCBI CDD database (62) were used as queries for PSI-BLAST searches (E-value:  $10^{-4}$ , other parameters were default) to find respective homologs. All ORFs within 10 kb regions up- and downstream of *cas7f* genes (to cover potential complete I-F system) and 20 kb regions up- and downstream of *tnsQ/tnsD* and *tnsA* (to cover potential Tn7-like elements) were further annotated using RPS-BLAST searches with 30,953 profiles (COG, pfam, cd) from the NCBI CDD database and 217 custom Cas protein profiles (2). The CRISPR-Cas system (sub)type identification for all loci was performed using previously described procedures (2).

### ***Protospacer analysis***

The CRISPRfinder (63) and PILER-CR (64) programs were used with default parameters to identify CRISPR arrays in Cas7f and TnsA/TnsD loci. The MEGABLAST program (65) (word size 18, otherwise default parameters) was used to search for protospacers in the virus subset of the NR database and the prokaryotic genome database. Matches were considered only if they showed at least 95% identity and at least 95% length coverage in the case of the NR database, and 80% identity and 80% length coverage for the self-hits (hits were classified as self if they matched the same genomes or genome of the same species disregarding the strain information). Because the automatic approach missed several short CRISPR arrays, loci initially found to lack CRISPR were analyzed manually by examining the intergenic region downstream of the *cas6f*

gene for repeats and using the BLASTN program with the default parameters to find matches to the spacer identified.

### *Clustering and Phylogenetic Analysis*

To construct a non-redundant, representative sequence set, protein sequences within families of interest were clustered using the NCBI BLASTCLUST program. (<ftp://ftp.ncbi.nih.gov/blast/documents/blastclust.html>) with the sequence identity threshold of 90% and length coverage threshold of 0.9. Short fragments or disrupted sequences were discarded. Multiple alignments of protein sequences were constructed using MUSCLE (66) or MAFFT (67) programs. Sites with the gap character fraction values >0.5 and homogeneity <0.1 were removed from the alignment. Phylogenetic analysis was performed using the FastTree program (68), with the WAG evolutionary model and the discrete gamma model with 20 rate categories. The same program was used to compute bootstrap values.

Relationships within diverse sequence families were established using the following procedure: initial sequence clusters were obtained using UCLUST (69) with the sequence similarity threshold of 0.5; sequences were aligned within clusters using MUSCLE (66). Then, cluster-to-cluster similarity scores were obtained using HHsearch (70) (including trivial clusters consisting of a single sequence each), and a UPGMA dendrogram was constructed from the pairwise similarity scores. Highly similar clusters (pairwise score to self-score ratio >0.1) were aligned to each other using HHALIGN (70), and the procedure was repeated iteratively. At the last step, sequence-based trees were reconstructed from the cluster alignments using the FastTree program (68) as described above and rooted by mid-point; these trees were grafted onto the tips of the profile similarity-based UPGMA dendrogram.

410

# 411 ***Analysis of Tn7-like elements***

412 End-sequences of Tn7-like elements were determined by identifying the directly-repeated five  
413 base pair target site duplication, the terminal eight base-pair sequence, and 22 base pair TnsB-  
414 binding sites as described in the text using Gene Construction Kit 4.0 to manipulate DNA  
415 sequences and search for DNA repeats. Sequence files were derived from matches to *cas7f*, *tnsA*  
416 and *tniQ* as described above.

417

418 **Author contributions.** J.E.P, K.S.M. and S.S. performed genomic analysis. J.E.P, K.S.M and  
419 E.V.K. designed the analysis, participated in the data interpretation and discussion, and wrote the  
420 paper.

421

# 422 **Acknowledgements**

423 JEP was supported by the USDA National Institute of Food and Agriculture, Hatch project  
424 NYC-189438. KSM, SS and EVK are supported by the intramural program of the U.S.  
425 Department of Health and Human Services (to the National Library of Medicine).

426

427

428

429 **Competing interests.** The authors declare no competing financial interests.

430

- 431 1. Mohanraju P, *et al.* (2016) Diverse evolutionary roots and mechanistic variations of the CRISPR-  
432 Cas systems. *Science* 353(6299):aad5147
- 433 2. Makarova KS, *et al.* (2015) An updated evolutionary classification of CRISPR-Cas systems. *Nat*  
434 *Rev Microbiol* 13(11):722-736
- 435 3. Shmakov S, *et al.* (2017) Diversity and evolution of class 2 CRISPR-Cas systems. *Nat Rev*  
436 *Microbiol* 15(3):169-182
- 437 4. Burstein D, *et al.* (2016) New CRISPR-Cas systems from uncultivated microbes. *Nature*
- 438 5. Koonin EV, Makarova KS, & Zhang F (2017) Diversity, classification and evolution of CRISPR-Cas  
439 systems. *Curr Opin Microbiol* in press
- 440 6. Amitai G & Sorek R (2016) CRISPR-Cas adaptation: insights into the mechanism of action. *Nat*  
441 *Rev Microbiol* 14(2):67-76
- 442 7. Heler R, *et al.* (2015) Cas9 specifies functional viral targets during CRISPR-Cas adaptation. *Nature*  
443 519(7542):199-202
- 444 8. Wei Y, Terns RM, & Terns MP (2015) Cas9 function and host genome sampling in Type II-A  
445 CRISPR-Cas adaptation. *Genes Dev* 29(4):356-361
- 446 9. Vorontsova D, *et al.* (2015) Foreign DNA acquisition by the I-F CRISPR-Cas system requires all  
447 components of the interference machinery. *Nucleic Acids Res* 43(22):10848-10860
- 448 10. Charpentier E, Richter H, van der Oost J, & White MF (2015) Biogenesis pathways of RNA guides  
449 in archaeal and bacterial CRISPR-Cas adaptive immunity. *FEMS Microbiol Rev* 39(3):428-441
- 450 11. Jackson RN & Wiedenheft B (2015) A Conserved Structural Chassis for Mounting Versatile  
451 CRISPR RNA-Guided Immune Responses. *Mol Cell* 58(5):722-728
- 452 12. Tsui TK & Li H (2015) Structure Principles of CRISPR-Cas Surveillance and Effector Complexes.  
453 *Annu Rev Biophys* 44:229-255
- 454 13. Makarova KS, Grishin NV, Shabalina SA, Wolf YI, & Koonin EV (2006) A putative RNA-  
455 interference-based immune system in prokaryotes: computational analysis of the predicted  
456 enzymatic machinery, functional analogies with eukaryotic RNAi, and hypothetical mechanisms  
457 of action. *Biol Direct* 1:7
- 458 14. Brouns SJ, *et al.* (2008) Small CRISPR RNAs guide antiviral defense in prokaryotes. *Science*  
459 321(5891):960-964
- 460 15. Hochstrasser ML, *et al.* (2014) CasA mediates Cas3-catalyzed target degradation during CRISPR  
461 RNA-guided interference. *Proc Natl Acad Sci U S A* 111(18):6618-6623
- 462 16. Huo Y, *et al.* (2014) Structures of CRISPR Cas3 offer mechanistic insights into Cascade-activated  
463 DNA unwinding and degradation. *Nat Struct Mol Biol* 21(9):771-777
- 464 17. Samai P, *et al.* (2015) Co-transcriptional DNA and RNA Cleavage during Type III CRISPR-Cas  
465 Immunity. *Cell* 161(5):1164-1174
- 466 18. Zhang J, Graham S, Tello A, Liu H, & White MF (2016) Multiple nucleic acid cleavage modes in  
467 divergent type III CRISPR systems. *Nucleic Acids Res* 44(4):1789-1799
- 468 19. Majumdar S, *et al.* (2015) Three CRISPR-Cas immune effector complexes coexist in *Pyrococcus*  
469 *furiosus*. *RNA* 21(6):1147-1158
- 470 20. Deng L, Garrett RA, Shah SA, Peng X, & She Q (2013) A novel interference mechanism by a type  
471 IIIB CRISPR-Cmr module in *Sulfolobus*. *Mol Microbiol* 87(5):1088-1099
- 472 21. Staals RH, *et al.* (2013) Structure and activity of the RNA-targeting Type III-B CRISPR-Cas complex  
473 of *Thermus thermophilus*. *Mol Cell* 52(1):135-145
- 474 22. Staals RH, *et al.* (2014) RNA targeting by the type III-A CRISPR-Cas Csm complex of *Thermus*  
475 *thermophilus*. *Mol Cell* 56(4):518-530
- 476 23. Elmore JR, *et al.* (2016) Bipartite recognition of target RNAs activates DNA cleavage by the Type  
477 III-B CRISPR-Cas system. *Genes Dev* 30(4):447-459

- 478 24. Gleditsch D, *et al.* (2016) Modulating the Cascade architecture of a minimal Type I-F CRISPR-Cas  
479 system. *Nucleic Acids Res* 44(12):5872-5882
- 480 25. Peters JE (2014) Tn7. *Microbiology Spectrum* 2(5):1-20
- 481 26. Mitra R, McKenzie GJ, Yi L, Lee CA, & Craig NL (2010) Characterization of the TnsD-attTn7  
482 complex that promotes site-specific insertion of Tn7. *Mobile DNA* 1(1):18
- 483 27. Wolkow CA, DeBoy RT, & Craig NL (1996) Conjugating plasmids are preferred targets for Tn7.  
484 *Genes & Dev.* 10:2145-2157
- 485 28. Finn JA, Parks AR, & Peters JE (2007) Transposon Tn7 Directs Transposition into the Genome of  
486 Filamentous Bacteriophage M13 Using the Element-Encoded TnsE Protein. *Journal of*  
487 *Bacteriology* 189(24):9122-9125
- 488 29. Parks AR, *et al.* (2009) Transposition into replicating DNA occurs through interaction with the  
489 processivity factor. *Cell* 138(4):685-695
- 490 30. Shi Q, *et al.* (2015) Conformational toggling controls target site choice for the heteromeric  
491 transposase element Tn7. *Nucleic Acids Res*
- 492 31. Peters JE, Fricker AD, Kapili BJ, & Petassi MT (2014) Heteromeric transposase elements:  
493 generators of genomic islands across diverse bacteria. *Mol Microbiol* 93(6):1084-1092
- 494 32. May EW & Craig NL (1996) Switching from cut-and-paste to replicative Tn7 transposition.  
495 *Science* 272:401-404
- 496 33. Choi KY, Li Y, Sarnovsky R, & Craig NL (2013) Direct interaction between the TnsA and TnsB  
497 subunits controls the heteromeric Tn7 transposase. *Proceedings of the National Academy of*  
498 *Sciences* 110(22):E2038-2045
- 499 34. Hickman AB, *et al.* (2000) Unexpected structural diversity in DNA recombination: the restriction  
500 endonuclease connection. *Mol. Cell* 5(6):1025-1034
- 501 35. Arciszewska LK & Craig NL (1991) Interaction of the Tn7-encoded transposition protein TnsB  
502 with the ends of the transposon. *Nucl. Acids Res.* 19:5021-5029
- 503 36. Gary PA, Biery MC, Bainton RJ, & Craig NL (1996) Multiple DNA processing reactions underlie  
504 Tn7 transposition. *J. Mol. Biol.* 257:301-316
- 505 37. Holder JW & Craig NL (2010) Architecture of the Tn7 Posttransposition Complex: An Elaborate  
506 Nucleoprotein Structure. *Journal of Molecular Biology* 401(2):167-181
- 507 38. Rose A (2010) TnAbaR1: a novel Tn7-related transposon in *Acinetobacter baumannii* that  
508 contributes to the accumulation and dissemination of large repertoires of resistance genes.  
509 *Bioscience Horizons* 3(1):40-48
- 510 39. Hamidian M & Hall RM (2011) AbaR4 replaces AbaR3 in a carbapenem-resistant *Acinetobacter*  
511 *baumannii* isolate belonging to global clone 1 from an Australian hospital. *Journal of*  
512 *Antimicrobial Chemotherapy* 66(11):2484-2491
- 513 40. Sugiyama T, Iida T, Izutsu K, Park KS, & Honda T (2008) Precise region and the character of the  
514 pathogenicity island in clinical *Vibrio parahaemolyticus* strains. *J Bacteriol* 190(5):1835-1837
- 515 41. Parks AR & Peters JE (2009) Tn7 elements: engendering diversity from chromosomes to  
516 episomes. *Plasmid* 61(1):1-14
- 517 42. Bainton RJ, Kubo KM, Feng JN, & Craig NL (1993) Tn7 transposition: target DNA recognition is  
518 mediated by multiple Tn7-encoded proteins in a purified in vitro system. *Cell* 72(6):931-943
- 519 43. McKown RL, Orle KA, Chen T, & Craig NL (1988) Sequence requirements of *Escherichia coli*  
520 attTn7, a specific site of transposon Tn7 insertion. *Journal of Bacteriology* 170(1):352-358
- 521 44. Rao JE, Miller PS, & Craig NL (2000) Recognition of triple-helical DNA structures by transposon  
522 Tn7. *Proc. Natl. Acad. Sci. USA* 97:3936-3941
- 523 45. Mojica FJ, Diez-Villasenor C, Garcia-Martinez J, & Almendros C (2009) Short motif sequences  
524 determine the targets of the prokaryotic CRISPR defence system. *Microbiology* 155(Pt 3):733-  
525 740



- 526 46. Shah SA, Hansen NR, & Garrett RA (2009) Distribution of CRISPR spacer matches in viruses and  
527 plasmids of crenarchaeal acidothermophiles and implications for their inhibitory mechanism.  
528 *Biochem Soc Trans* 37(Pt 1):23-28
- 529 47. Stern A, Keren L, Wurtzel O, Amitai G, & Sorek R (2010) Self-targeting by CRISPR: gene regulation  
530 or autoimmunity? *Trends Genet* 26(8):335-340
- 531 48. Bainton RJ, Kubo KM, Feng J-N, & Craig NL (1993) Tn7 transposition: target DNA recognition is  
532 mediated by multiple Tn7-encoded proteins in a purified in vitro system. *Cell* 72:931-943
- 533 49. Rao JE, Miller PS, & Craig NL (2000) Recognition of triple-helical DNA structures by transposon  
534 Tn7. *Proceedings of the National Academy of Sciences* 97(8):3936-3941
- 535 50. Kuduvalli P, Rao JE, & Craig NL (2001) Target DNA structure plays a critical role in Tn7  
536 transposition. *EMBO J.* 20(4):924-932
- 537 51. Waddell CS & Craig NL (1988) Tn7 transposition: two transposition pathways directed by five  
538 Tn7-encoded genes. *Genes & Development*:137-149
- 539 52. Stellwagen A & Craig NL (1997) Gain-of-function mutations in TnsC, an ATP-dependent  
540 transposition protein which activates the bacterial transposon Tn7. *Genetics* 145:573-585
- 541 53. Biery MC, Steward F, Stellwagen AE, Raleigh EA, & Craig NL (2000) A simple *in vitro* Tn7-based  
542 transposition system with low target site selectivity for genome and gene analysis. *Nucleic Acids*  
543 *Res.* 28:1067-1077
- 544 54. Rao JE & Craig NL (2001) Selective recognition of pyrimidine motif triplexes by a protein  
545 encoded by the bacterial transposon Tn7. *J Mol. Biol.* 307:1161-1170
- 546 55. Peters JE & Craig Nancy L (2001) Tn7 recognizes transposition target structures associated with  
547 DNA replication using the DNA-binding protein TnsE. *Genes and Development* 15(6):737-747
- 548 56. Rutkauskas M, *et al.* (2015) Directional R-Loop Formation by the CRISPR-Cas Surveillance  
549 Complex Cascade Provides Efficient Off-Target Site Rejection. *Cell Rep*
- 550 57. Levy A, *et al.* (2015) CRISPR adaptation biases explain preference for acquisition of foreign DNA.  
551 *Nature* 520(7548):505-510
- 552 58. Koonin EV & Krupovic M (2015) A moveable defense. *The Scientist* (January 2015)
- 553 59. Krupovic M, Makarova KS, Forterre P, Prangishvili D, & Koonin EV (2014) Casposons: a new  
554 superfamily of self-synthesizing DNA transposons at the origin of prokaryotic CRISPR-Cas  
555 immunity. *BMC Biol* 12(1):36
- 556 60. Seed KD, Lazinski DW, Calderwood SB, & Camilli A (2013) A bacteriophage encodes its own  
557 CRISPR/Cas adaptive response to evade host innate immunity. *Nature* 494(7438):489-491
- 558 61. Besemer J, Lomsadze A, & Borodovsky M (2001) GeneMarkS: a self-training method for  
559 prediction of gene starts in microbial genomes. Implications for finding sequence motifs in  
560 regulatory regions. *Nucleic Acids Res* 29(12):2607-2618
- 561 62. Marchler-Bauer A, *et al.* (2013) CDD: conserved domains and protein three-dimensional  
562 structure. *Nucleic Acids Res* 41(Database issue):D348-352
- 563 63. Grissa I, Vergnaud G, & Pourcel C (2007) CRISPRFinder: a web tool to identify clustered regularly  
564 interspaced short palindromic repeats. *Nucleic Acids Res* 35(Web Server issue):W52-57
- 565 64. Edgar RC (2007) PILER-CR: fast and accurate identification of CRISPR repeats. *BMC*  
566 *Bioinformatics* 8:18
- 567 65. Morgulis A, *et al.* (2008) Database indexing for production MegaBLAST searches. *Bioinformatics*  
568 24(16):1757-1764
- 569 66. Edgar RC (2004) MUSCLE: multiple sequence alignment with high accuracy and high throughput.  
570 *Nucleic Acids Res* 32(5):1792-1797
- 571 67. Katoh K & Standley DM (2013) MAFFT multiple sequence alignment software version 7:  
572 improvements in performance and usability. *Mol Biol Evol* 30(4):772-780

## Tn7 and CRISPR-Cas

- 573 68. Price MN, Dehal PS, & Arkin AP (2010) FastTree 2--approximately maximum-likelihood trees for  
574 large alignments. *PLoS One* 5(3):e9490
- 575 69. Edgar RC (2010) Search and clustering orders of magnitude faster than BLAST. *Bioinformatics*  
576 26(19):2460-2461
- 577 70. Soding J (2005) Protein homology detection by HMM-HMM comparison. *Bioinformatics*  
578 21(7):951-960
- 579
- 580
- 581
- 582



## Figures legends

### Figure 1 - Schematic representation of the complete and minimal type I-F CRISPR-Cas

**systems and Tn7 transposition.** A. Gene organizations of a complete and a minimal type I-F CRISPR-Cas system lacking the genes for proteins responsible for adaptation and target cleavage. Minimal I-F systems contain fused *cas8f* and *cas5f* genes that are characteristic of this group (2). Together, these proteins can be predicted to be subunits of a minimal Cascade complex. B. Gene structure of the Tn7 genes flanked by left (L) and right (R) end sequences. Transposition catalyzed by the TnsABC+TnsD proteins directs the transposon into a single chromosomal site in bacterial genomes (*attTn7*). Transposition catalyzed by the TnsABC+TnsE proteins preferentially directs transposition into actively conjugating DNA and filamentous bacteriophage (shown by a red circle with arrows). The transposon is denoted by a rectangle in the attachment site. DNA sequence omitted in the graphic is denoted with two back slashes. See text for details.

### Figure 2 Schematic evolutionary trees for the Cas7f, TnsA and TniQ/TnsD protein families.

- A.** The dendrogram was built using 2905 Cas7f proteins as described in Material and Method section (see complete tree at [ftp://ftp.ncbi.nih.gov/pub/makarova/supplement/Peters\\_at\\_al\\_2017/](ftp://ftp.ncbi.nih.gov/pub/makarova/supplement/Peters_at_al_2017/)). The major subtrees are collapsed and shown by triangles. The branch corresponding to the minimal I-F variant is colored in orange, and the bootstrap value for this subtree is shown.
- B.** The dendrogram was built using 7023 TnsA protein sequences (see complete at [ftp://ftp.ncbi.nih.gov/pub/makarova/supplement/Peters\\_at\\_al\\_2017/](ftp://ftp.ncbi.nih.gov/pub/makarova/supplement/Peters_at_al_2017/)). The branch corresponding to TnsA in the loci containing I-F variant *cas* genes is colored in orange

and I-B subtype *cas* genes are colored in green. The CRISPR-Cas subtypes are indicated next to the respective branches. Distinct cyanobacterial strains are indicated next to the respective I-B systems. The bootstrap value for TnsA branch associated with I-F *cas* genes is shown.

**C.** The dendrogram was built using 7963 TniQ proteins (see complete tree at [ftp://ftp.ncbi.nih.gov/pub/makarova/supplement/Peters\\_at\\_al\\_2017/](ftp://ftp.ncbi.nih.gov/pub/makarova/supplement/Peters_at_al_2017/)). The designations are the same as for the TnsA dendrogram in B.

**Figure 3. Schematic representation of Tn7, Tn6022, and selected Tn7-like transposons containing *cas* genes.** Genomic features recognized by the transposon-encoded TniQ protein are indicated on the left (*glmS*, *yifB*, IMPDH, *yciA* and SRP-RNA). Color coding and labeling are as in Figure 1. Elements other than Tn7 and Tn6022 are denoted by the respective TnsA tree leaves (#XX)(Tn6022=Tree node #582)(Supplemental Table S2). Other genes are shown in grey, and known Tn7 cargo genes are indicated. Black vertical bars indicate repeats in the element-encoded arrays. DNA sequences omitted in the graphic is shown with two back slashes. See text for details.

**Figure 4. Phylogenetic tree of selected representatives of type I-F-associated TniQ-like proteins.** A maximum likelihood phylogenetic tree was built as described in Materials and Methods for a selected set of TniQ-like proteins associated with the type I-F CRISPR-Cas variant and a few sequences from the outgroup outlined in the Figure 2C (67 sequences altogether). The numbers at internal branches indicate bootstrap support (percent); only values

greater than 70% are indicated. Elements located in one of the three attachment sites identified in this work are shown by color as indicated (*yciA*, IMPDH, and SRP-RNA); random sites. The TniQ tree leaves (#XX)(Supplemental Table S2) are shown in green.

**Figure 5. Model of the two targeting pathways for Tn7 elements containing CRISPR-Cas system.** Designations are the same as in Figure 1.

**Figure 6. Models of the three previously described Tn7 targeting pathways and the proposed CRISPR-Cas-facilitated transposition pathway.** Representations of TnsABC+TnsD (A) and TnsABC+TnsE (B) transposition pathways, the synthetic transposition pathway that targets triplex DNA complexes with a mutant form of TnsC, TnsABC\* (C) and the proposed targeting pathway mediated by Cas interference complexes (D) are shown. Known host factors that participate in the TnsD and TnsE pathways are also shown (ACP, L29, and DnaN). See text for details and references.

651

652 **Table 1. Characteristics of selected Tn7 loci associated with *cas* genes.**

| TnsA Node <sup>1</sup> | Strain                                                              | (Right) <u>TSD</u> .end.TnsB-binding/<br>//TnsB-binding.end. <u>TSD</u> (Left) <sup>2</sup>                                                        | Insertion position           | Size (bp)        |
|------------------------|---------------------------------------------------------------------|----------------------------------------------------------------------------------------------------------------------------------------------------|------------------------------|------------------|
| 2                      | <i>Vibrio parahaemolyticus</i> RIMD_210633_GCA_000196095.1          | <u>gagtt</u> tgtaaatacaaccatacattgcaacaatac//<br><br>//tataaatgtcactttatggttgatcaaca <u>gagtt</u>                                                  | <i>yciA</i> (17 bp upstream) | 80,041           |
| 141                    | <i>Vibrio campbellii</i> ATCC_BAA_1116_GCA_000017705.1              | <u>ttaaat</u> gtaaaaacaactaaacgttgatttacga//<br><br>//ttttataaaccatggttaattattttttac <u>attaaa</u>                                                 | IMPDH (21 bp downstream)     | 27,150           |
| 199                    | <i>Vibrio parahaemolyticus</i> O1_Kuk_FDA_R31_GCA_000430405.1\      | <u>tgagt</u> tgttgatacaaccataaaatgataattaca//<br><br>//tataaatatcactttatggttgatcaaca <u>tgagt</u>                                                  | <i>yciA</i> (17 bp upstream) | 107,025          |
| 262                    | <i>Vibrio fluvialis</i> ATCC_33809_GCA_001558415.1                  | <u>aaaat</u> tgttgaaacaaccataaattgatatttaca//<br><br>//tatgaatatcaagatatggttgatcaaca <u>aaaat</u><br>//cgtaaatatcaattttatggttgatcaaca <u>gaaaa</u> | IMPDH (21 bp downstream)     | 43,582<br>56,066 |
| 298                    | <i>Vibrio cholerae</i> VC35_GCA_000299495.2                         | <u>ccatc</u> tgatgtttgcaaaataagttgcataaatt//<br><br>//tgtctatgcagacttatgctgcaagcatca <u>ccatc</u>                                                  | SRP-RNA (6 bp downstream)    | 28,955           |
| 330                    | <i>Vibrio natriegens</i> NBRC_15636_ATCC_14048_DSM_759_GCA_00041790 | <u>cattg</u> tgaagcctgcaatatatgttcgcataaatt//<br><br>//ggactatgctaaattacgttgcaaggcatca <u>cattg</u>                                                | SRP-RNA (6 bp downstream)    | 23,147           |

# Tn7 and CRISPR-Cas

|      |                                                       |                                                                                                        |                                           |         |
|------|-------------------------------------------------------|--------------------------------------------------------------------------------------------------------|-------------------------------------------|---------|
|      | 5.1                                                   |                                                                                                        |                                           |         |
| 340  | Vibrio_crassostreae_J5_20_GCA_001048515.1             | <u>cttaat</u> gaagcctgcaatatatgttcgcataaatt//<br><br>//tagttatgcaggcatatgttgcaagcatca <u>cttaa</u>     | SRP-RNA (6 bp downstream)                 | 26,389  |
| 375  | Pseudoalteromonas_translucida_KMM_520_GCA_001465295.1 | <u>ttgggt</u> gtgtgtttgaagtataagttgacatatctg//<br><br>//tacttatgccaaacttatacttcaacaacat <u>ttgggt</u>  | SRP-RNA (22 bp downstream)                | 21,768  |
| 409  | Vibrio_cholerae_YB2A06_GCA_001402375.1                | <u>catct</u> gtgcgtgaaagcataaagtgccaattaa//<br><br>//agcataggacatcttatgtctttcagcgaca <u>catct</u>      | SRP-RNA (7 bp downstream)                 | 34,953  |
| 424  | Vibrio_hyugaensis_151112A_GCA_000818475.1             | <u>aaagct</u> gtcggttaaaccgataaacctgtcccaataa//<br><br>//gtggttgacgcattatgggttttagcgaca <u>aaagc</u>   | SRP-RNA (11 bp downstream)                | 30,851  |
| 438  | Vibrio_EJY3_EJY3_GCA_000241385.1                      | <u>gctgg</u> gtgtgctggaaccataagatgacatttttag//?<br><br>//taagggtgtcaccttatggctcctagccacag <u>ctgg</u>  | AraC type (16bp downstream)               | 117,187 |
| 446  | Shewanella_ANA_3_ANA_3_GCA_000203935.1                | <u>tgagt</u> gtgcgtgaaaccatacattgacataattg//<br><br>//ctgctgtgtcatgggtttggtttcagcgacat <u>tgagt</u>    | Conserved (inside the gene)               | 23,831  |
| 2757 | Cyanothece_PCC_8801_PCC_8801_GCA_000021805.1          | <u>aagttt</u> gtttttgcccgtatttttaaagttgttttt //<br><br>//aggcataaaccttgccgatgcggcaaaaaaca <u>aactt</u> | DNA methyltransferase (711 bp downstream) | 16,228  |
| 5291 | Anabaena_variabilis_ATCC_29413_GCA_000204075.1        | <u>ataaat</u> gtggagggaataattcggttcaacaatata//<br><br>//ataattgtttaaccgaattctttgtctaca <u>aatat</u>    | glmS (5 bp)                               | 31,369  |

653

654 <sup>1</sup> TnsA node number for each element cross-lists as indicated in Figures 3 and 4 and

655 supplemental Table S2.

656   <sup>2</sup> The inferred target site duplication (TSD)(red and underlined), 8 base pair end sequence (blue),  
657   and terminal most TnsB-binding site (in green) are indicated for the Right (Right) and Left (Left)  
658   transposon ends identified for each element indicated in Figure 3. See supplemental Figure S1  
659   for details.  
660

**Table 2. Spacers with identified matches**

| TnsA node           | DNA sequence with element                                                                                                                                            | Spacer (3bp 3')<br>Match (PAM) <sup>2</sup>                                        | Match                                                                                                                          | Hit accession number                   |
|---------------------|----------------------------------------------------------------------------------------------------------------------------------------------------------------------|------------------------------------------------------------------------------------|--------------------------------------------------------------------------------------------------------------------------------|----------------------------------------|
| 108,<br>120,<br>122 | Vibrio_parahaemolyticus_VI<br>P4_0434_GCA_000500425.<br>1<br>Vibrio_parahaemolyticus_07<br>_2965_GCA_000960565.1<br>Vibrio_parahaemolyticus_S<br>028_GCA_000491615.1 | Catgtcaggggtaaaactcactgagccaacaa( att )<br>Catatcaggggtaaaactcactgagccaacaa( tat ) | <b>Chromosome,</b><br>element itself                                                                                           | CP011406.1<br>CP003973.1<br>BA000032.2 |
| 267                 | Vibrio_cholerae_HE_45_GC<br>A_000279285.1                                                                                                                            | Attgaggacatagacaaaacttgatctttaa( gtt )<br>Atcgaggacaagacaaaacttgatctttaa( agt )    | <b>Plasmid,</b> integrase<br>(integron), <i>Vibrio</i><br><i>tubishii</i> ATCC<br>19109                                        | CP009358.1                             |
|                     |                                                                                                                                                                      | Ctgaaaagcaatgaagcgaagcgctcgttaa( gtt )<br>Ctgaaaagcaatgaagcgaaacgctcgtcag( ggc )   | <b>Plasmid,</b> DNA<br>Polymerase<br><i>Methylophaga</i><br><i>frappieri</i> strain JAM7<br>plasmid                            | CP003381.1                             |
| 271                 | Photobacterium_kishitanii_2<br>01212X_GCA_001455895.1                                                                                                                | Aatgtctacacattacaaggcttacttgccgc( gtg )<br>Aatgtctacgctttacaaggcttactcgctgc( aaa ) | <b>Chromosome,</b><br>match 51 bp from<br>right end of insertion                                                               | LNTE0100001<br>2                       |
| 436                 | Photobacterium_leiognathi_<br>mandapamensis_GCA_001<br>558075.1                                                                                                      | Aaagtatgggaacggagaaacggttctttgc( gtg )<br>Agaatattagggaacggagaaacggttctttgc( tta ) | <b>Chromosome,</b><br>match 30 bp from<br>right end of insertion                                                               | LNRA010000<br>01                       |
| 139                 | Vibrio_parahaemolyticus_S<br>019_GCA_000491795.1                                                                                                                     | Aatcattgaccaaaccataccacaaaatcact( att )<br>Aatcattgaccagacatatcacaaaatcaca( ggt )  | <b>Plasmid,</b><br>hypothetical protein,<br><i>Vibrio</i><br><i>parahaemolyticus</i><br>strain VPS92<br>plasmid pVPS92-<br>VEB | KU356480.1                             |
|                     |                                                                                                                                                                      | Aatcattgaccaaaccataccacaaaatcact( att )<br>Aatcattgaccagacatatcacaaaatatt( ggt )   | <b>Plasmid,</b><br>hypothetical protein,                                                                                       | LN831184.1                             |

## Tn7 and CRISPR-Cas

|     |                                                  |                                                                                    |                                                                                                                  |                                                            |
|-----|--------------------------------------------------|------------------------------------------------------------------------------------|------------------------------------------------------------------------------------------------------------------|------------------------------------------------------------|
|     |                                                  |                                                                                    | <i>Vibrio cholerae</i> 116-14, plasmid / pNDM-116-14                                                             |                                                            |
| 145 | Marinomonas_S3726_S3726_GCA_000967665.1          | Tataccaccaaagaacccgatggtagcttcaa (gtg)<br>Tatactaccaaagaacacagatggtagcttcaa (gca)  | <b>Chromosome</b> , catabolite regulation protein CreA, <i>Vibrio anguillarum</i> strain 90-11-286 chromosome II | CP011461.1<br>Many others                                  |
| 285 | Vibrio_vulnificus_SC9740_GCA_000959765.1         | Atatcagcaatagctagcactactcactgtgtc (gtg)<br>Atatcagcaattgctagcactactcacagtgtc (cgt) | <b>Plasmid</b> , hypothetical gene, <i>Vibrio vulnificus</i> strain FORC_017                                     | CP012741.1<br>2 other plasmids<br>KX765275.1<br>CP009849.1 |
| 311 | Vibrio_alginolyticus_UCD_30C_GCA_001306785.1     | Aactagtaaatacactcgaaacatcattatta (gtg)<br>Aactagtaaatacactcgaaacatcattatta (act)   | <b>Plasmid</b> , RdgC superfamily protein, <i>Vibrio alginolyticus</i> strain ATCC 33787 plasmid pMBL287         | CP013487.1                                                 |
| 353 | Vibrio_fischeri_MJ11_GCA_000020845.1             | Ttatagagaaattcagcattcgcaggt (gta)<br>Ttatagagaaactcagcattcgcaggt (aag)             | <b>Plasmid</b> , Repair ATPase, Plasmid found in the same strain                                                 | CP001134.1                                                 |
| 446 | Shewanella_ANA_3_ANA_3_GCA_000203935.1           | Gtttgattttaagaaggtcttgataaatagt (gtg)<br>Gtttgattttaagaaggttttgataaatagt (ttt)     | <b>Plasmid</b> , Hypothetical gene, <i>Shewanella xiamenensis</i> strain T17 / pSx1                              | CP013115.1                                                 |
|     |                                                  | Agcgtggggtaatcgaggtggtctgcttcac (gtg)<br>Agcgtggggtaatcgaggtggtcggcttcac (cac)     | <b>Bacteriophage</b> , MuB ATPase, <i>Shewanella oneidensis</i> MR-1                                             | AE014299.2                                                 |
| 263 | Vibrio_parahaemolyticus_ISF_25_6_GCA_001267595.1 | Acaaaacaaagtgttacactgtgtctaccgt (gtt)<br>Acaaaacaaagttagacgtgttatctaccgt (gtc)     | <b>Plasmid</b> , <i>Vibrio coralliilyticus</i> strain                                                            | CP009619.1                                                 |



## Tn7 and CRISPR-Cas

|       |                                                         |                                                                                                    | RE98 plasmid p380                                                                      |                            |
|-------|---------------------------------------------------------|----------------------------------------------------------------------------------------------------|----------------------------------------------------------------------------------------|----------------------------|
| 194   | Neptunomonas_japonica_D<br>SM_18939_GCA_00042276<br>5.1 | Tgcaggctggttcgccaatgcaacgctgtt (gtg)<br>Tgcaacctggttcgccaatcgcaacgctggt (cag)                      | <b>Chromosome,</b><br>hemolysin D gene<br><i>Rhodopirellula</i><br><i>baltica</i> SH 1 | BX294151.1                 |
| 399   | Ferrimonas_senticii_DSM_1<br>8821_GCA_000422665.1       | Tacagtgttgatgaggcgtttatgacgctggc (gtg)<br>Gacagagtttatgacgcgtttatgacgctggc (gtg)                   | <b>Chromosome,</b><br>Intergenic,<br><i>Pusillimonas</i> sp. T7-<br>7                  | CP002663.1                 |
| 407   | Vibrio_cholerae_YB3G04_G<br>CA_001402275.1              | Tcagagcgtattagacggacgcgcacagaca (gtg)<br>Tcagagcgtattagacggacgcgcacagata (taa)                     | <b>Plasmid, Vibrio</b><br><i>parahaemolyticus</i><br>plasmid pVPS91                    | KX957972.1                 |
| 5284# | Cyanothece_PCC_7822_P<br>CC_7822_GCA_000147335<br>.1    | Aatggaacggggcaaaatgtaaaatgtaaacgaatccc<br>(tga)<br>Aatgggacggggcaaaatgcaaaatataaacgtatccc<br>(atg) | <b>Plasmid,</b><br>Cyanothece sp.<br>PCC 7822 plasmid<br>Cy782202                      | CP002200.1<br>Same plasmid |

<sup>1</sup> TnsA node number for each element cross-lists as indicated in Supplemental Table S2.

2 Spacers were identified as described in the Materials and Methods section. Spacers (and 3 base pair located 3' in the repeat are indicated) for comparison with the match identified in the database (presumed PAM sequences). Mismatches between the spacer (3' sequence) and protospacer (PAM) are indicated in red.

A

canonical subtype I-F system

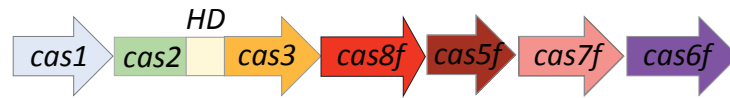

subtype I-F variant

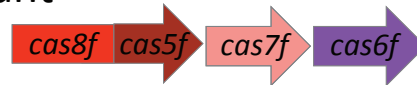

B

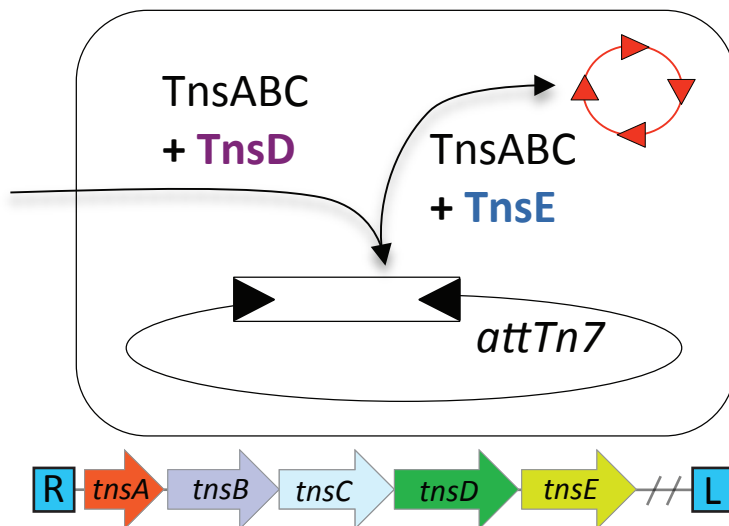

Figure 1

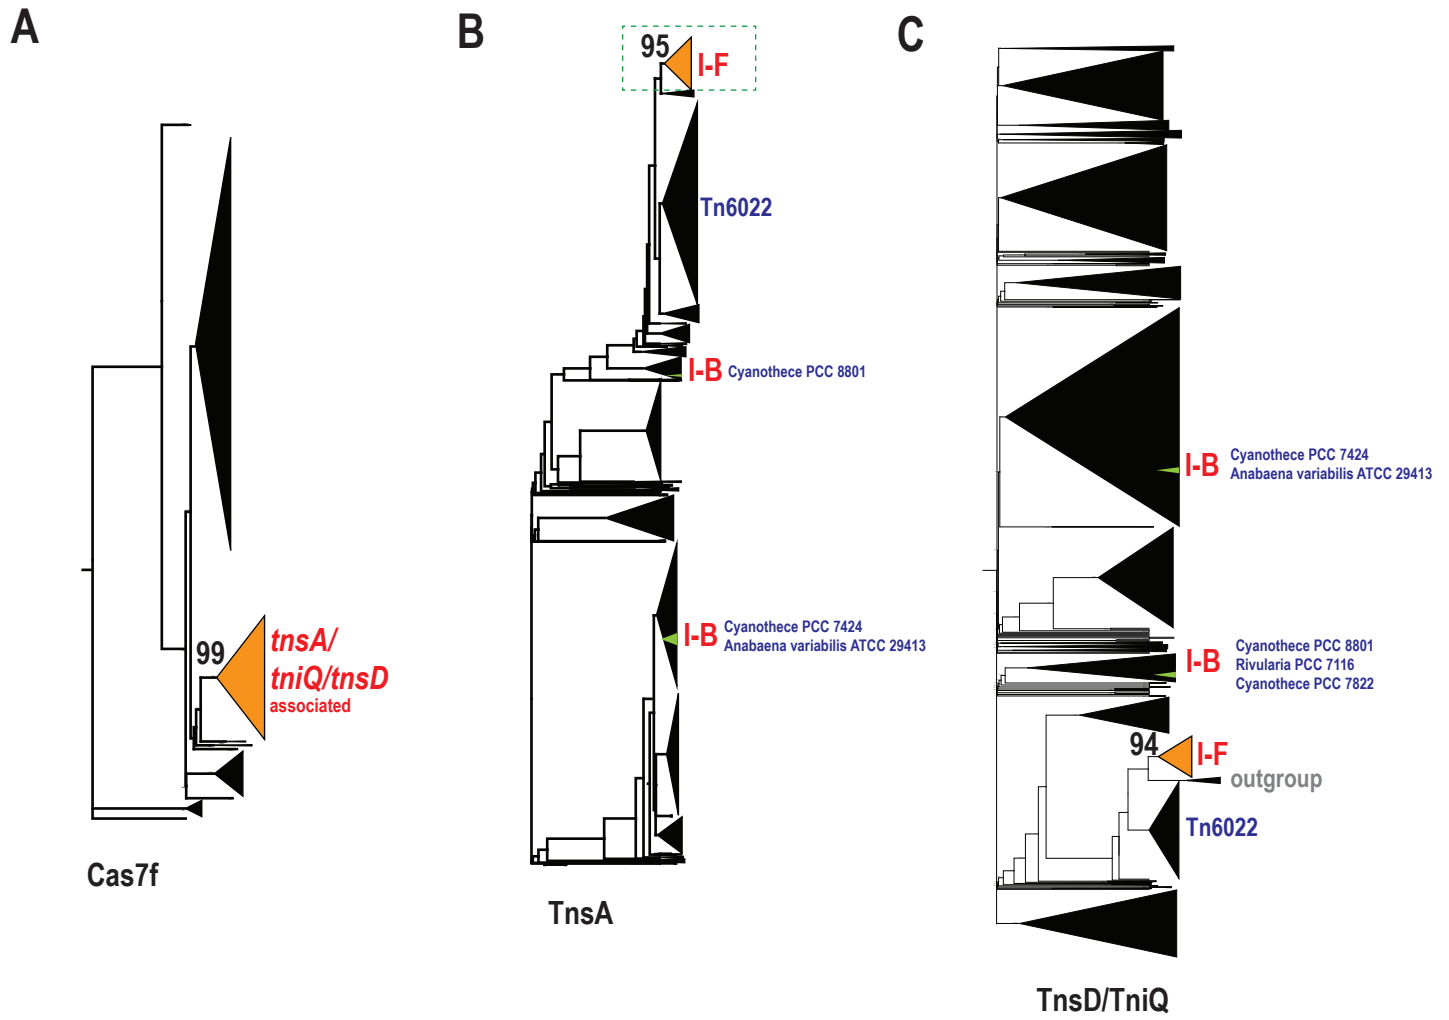

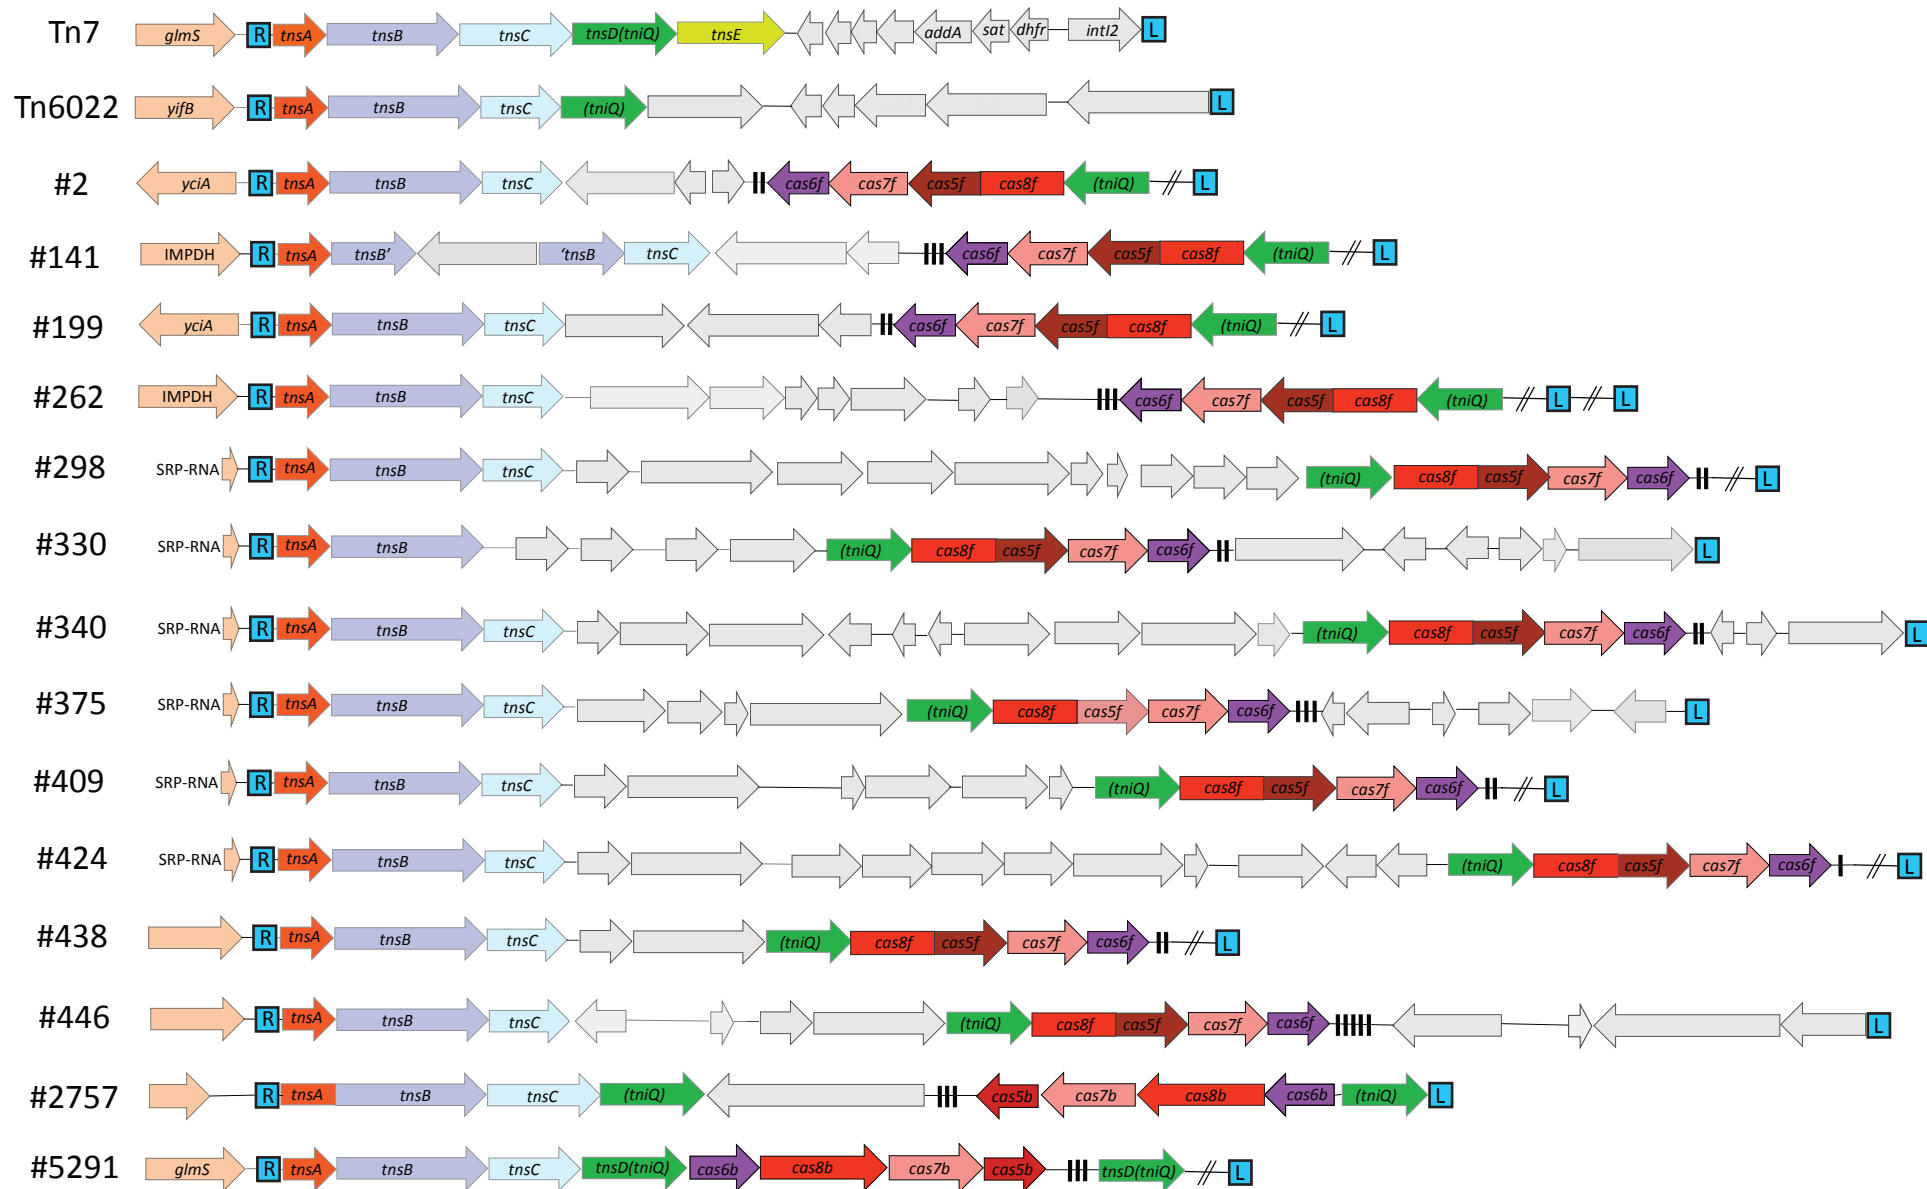

Figure 3

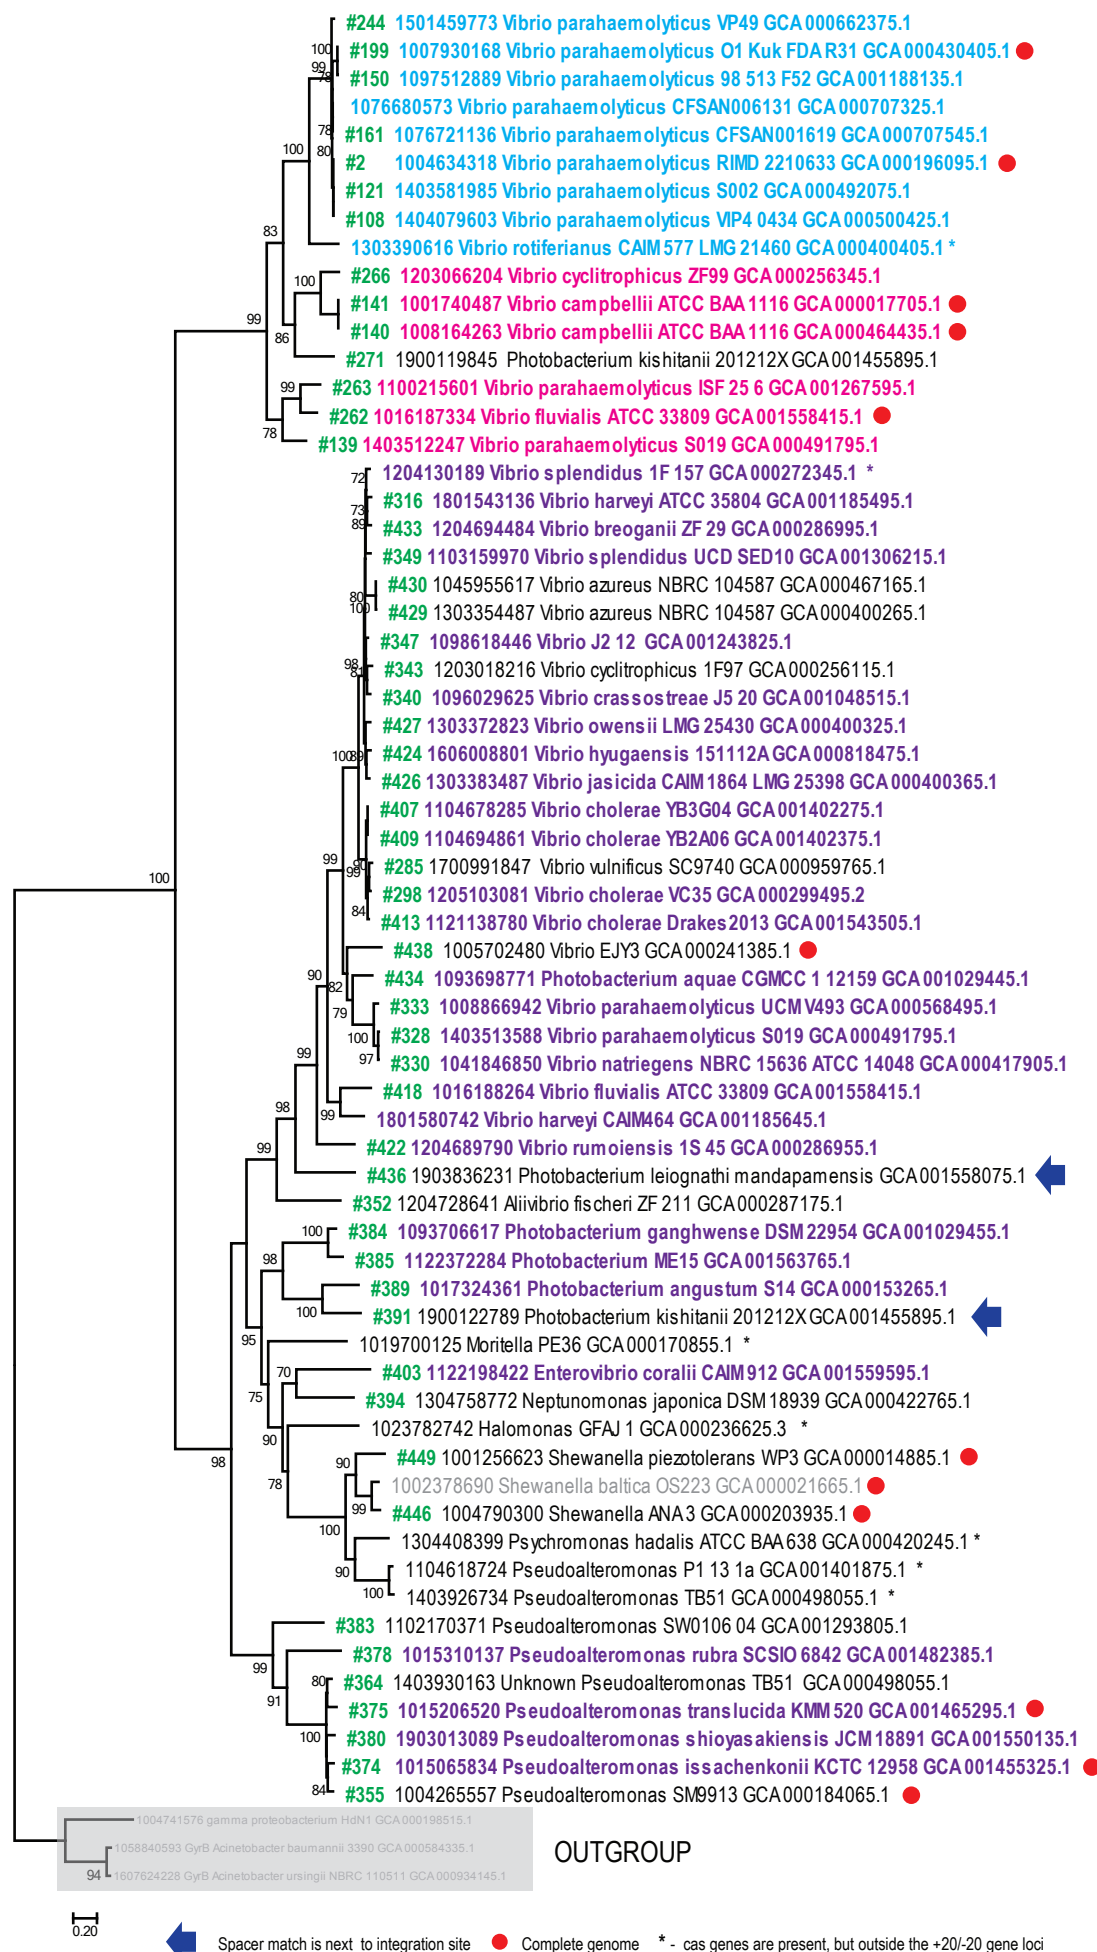

color code:

green - node number in TnsA tree  
sky blue - elements inserted next to *yciA* gene  
magenta - elements inserted next to IMPDH gene  
purple - elements inserted next to SNP-RNA  
black - random insertion site  
gray - cas genes are absent

Figure 4

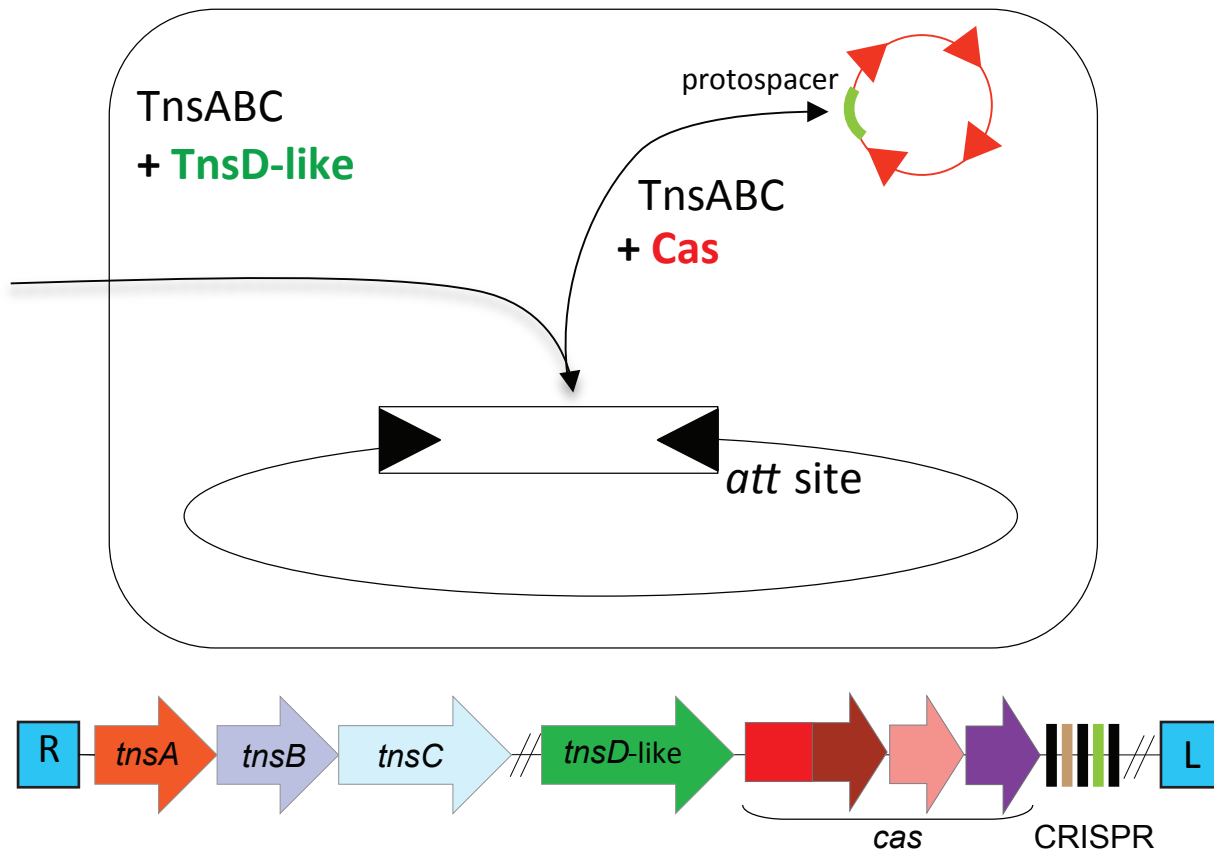

Figure 6

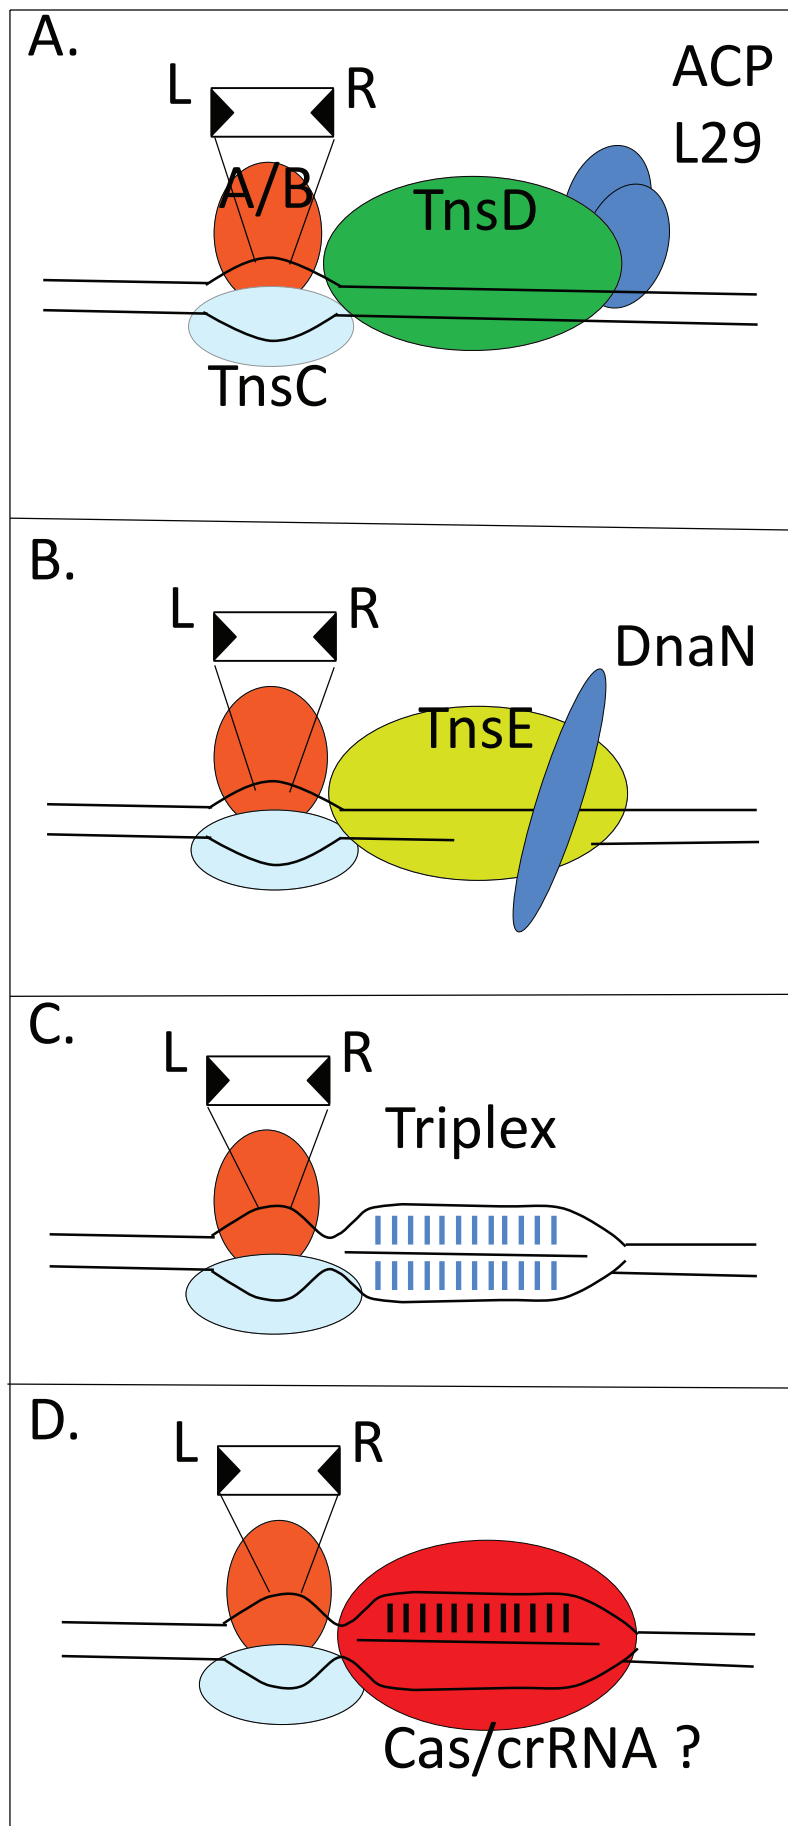

Figure 6
